# Supplementary material for: Synthesis of single layer graphene on Cu(111) by C60 supersonic molecular beam epitaxy
Source: Royal Society of Chemistry journal article supplement (doi:10.1039/c6ra02274j), 2016-01-01
Supplement: c6ra02274j4.pdf [file c6ra02274j4.pdf]

# Synthesis of single layer graphene on Cu(111) by C<sub>60</sub> Supersonic Molecular Beam Epitaxy

Roberta Tatti<sup>°</sup>, Lucrezia Aversa<sup>°</sup>, Roberto Verucchi<sup>°\*</sup>, Emanuele Cavaliere<sup>+</sup>, Giovanni Garberoglio<sup>#</sup>,  
Nicola M. Pugno<sup>†‡</sup>, Giorgio Speranza<sup>l</sup>, Simone Taioli<sup>\*#%</sup>.

<sup>°</sup>IMEM-CNR Sede di Trento, Trento (Italy)

<sup>+</sup>Dipartimento di Matematica e Fisica “Niccolò Tartaglia”, Università Cattolica del Sacro Cuore, Brescia (Italy)

<sup>#</sup>European Centre for Theoretical Studies in Nuclear Physics and Related Areas (ECT\*), Bruno Kessler Foundation & Trento Institute for Fundamental Physics and Applications (TIFPA-INFN), Trento (Italy)

<sup>†</sup> Laboratory of Bio-inspired & Graphene Nanomechanics, Department of Civil, Environmental and Mechanical Engineering, University of Trento, Italy.

<sup>‡</sup>School of Engineering and Materials Science, Queen Mary University of London (UK)

<sup>l</sup>Center for Materials and Microsystems, Bruno Kessler Foundation, Trento (Italy)

<sup>%</sup>Faculty of Mathematics and Physics, Charles University in Prague (Czech Republic)

**Corresponding Author**

\* taioli@ectstar.eu

## Supporting Information

### XPS and UPS analysis

Figure S1 (left panel) shows the Cu2p CL from polycrystalline and (111) copper surfaces. Emission from both surfaces shows the same characteristics, with presence of a 1/2 - 3/2 doublet located at ~952.4 eV and ~932.6 eV (see Table S1), with a 19.8 eV BE distance and the expected intensity ratio (1/2). The estimated Cu2p photoelectron attenuation length is about 1.4 nm, thus the low surface sensitivity does not enable an efficient analysis of the last copper atomic layer (0.2 nm), to have evidence of the proposed seven atom vacancy reconstruction. On the contrary, valence band (VB) curves are very different for the two copper surfaces, reflecting the ordered structure in the Cu(111) case (Figure S1, right panel).

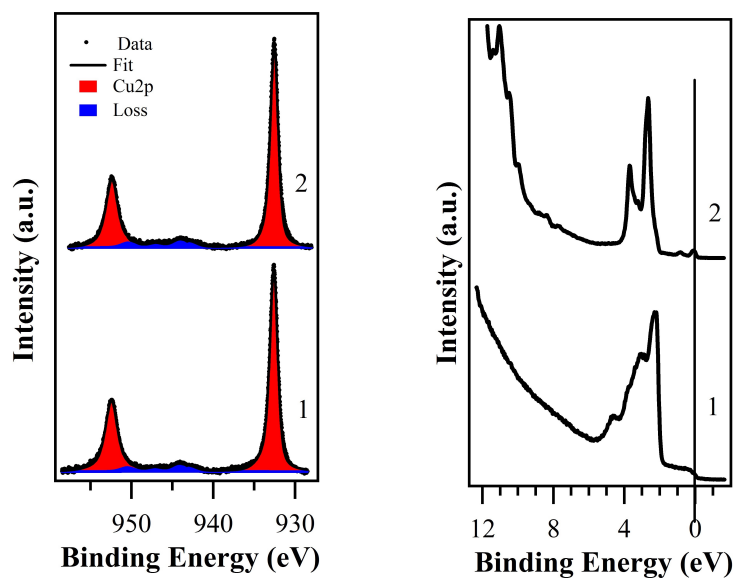

**Figure S1** Cu 2p CL (left panel) and VB (right panel) from a clean polycrystalline copper (1) and from a Cu(111) surface (2).

|                 | Cu Polycrystalline |           |      | Cu(111) |           |      |
|-----------------|--------------------|-----------|------|---------|-----------|------|
|                 | BE [eV]            | FWHM [eV] | %    | BE [eV] | FWHM [eV] | %    |
| <b>Cu2p 3/2</b> | 932.60             | 1.14      | 60.7 | 932.54  | 1.13      | 60.9 |
| <b>Cu2p 1/2</b> | 952.45             | 1.73      | 31.9 | 952.39  | 1.69      | 30.6 |
| <b>Loss</b>     | 942.70             | 2.00      | 1.6  | 942.64  | 2.00      | 1.9  |
| <b>Loss</b>     | 944.30             | 2.00      | 2.7  | 944.23  | 2.00      | 2.9  |
| <b>Loss</b>     | 947.08             | 2.00      | 1.4  | 947.00  | 2.00      | 1.6  |
| <b>Loss</b>     | 950.51             | 2.00      | 1.7  | 950.43  | 2.00      | 2.1  |

**Table S1** Analysis of Cu2p CL from a polycrystalline and a (111) copper surface.

This is evident for the 3d bands, as well as for the Fermi edge region, where presence of surface states dominates VB for the crystalline surface.<sup>1,2</sup> Figure S2 shows all C1s CL from analyzed C<sub>60</sub> film, while in Table S2 and S3 are described components characteristics. As can be seen, C1s core level from all C<sub>60</sub> 1 ML films are characterized by the same features (within typical errors), apart from film treated at two higher temperatures. Corresponding VB curves are shown in Figure S3.

**Figure S2** a) C1s CL from C<sub>60</sub> films deposited by SuMBE on Cu poly at 15 eV KE (1-3) and Cu(111) at 35 eV KE (4, 5) with thickness: 1) 20 nm; 2) 1 ML, after annealing at 430°C of a 20 nm film; 3) 1 ML; 4) 0.3 ML; 5) 0.6 ML. b) C1s from a C<sub>60</sub> 1 ML film deposited at RT and precursor 35 eV KE, after thermal annealing at 425°C (6), 645°C (7), 795°C (8). All depositions with substrate at RT. C1s emission from graphene single layer is shown for comparison (9).

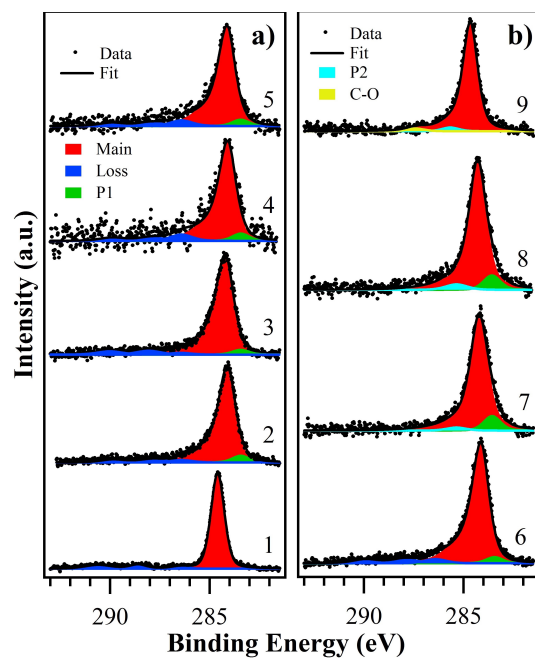

**Table S2** Analysis of C1s CL from C<sub>60</sub> films with different thickness.

|             | C <sub>60</sub> Bulk |           |      | 1ML, Poly Cu, KE=15eV,<br>400°C |           |      | 1ML, Cu(111), KE=35eV, RT |           |      |
|-------------|----------------------|-----------|------|---------------------------------|-----------|------|---------------------------|-----------|------|
|             | BE [eV]              | FWHM [eV] | %    | BE [eV]                         | FWHM [eV] | %    | BE [eV]                   | FWHM [eV] | %    |
| <b>C-C</b>  | 284.60               | 0.80      | 86.6 | 284.12                          | 0.90      | 86.9 | 284.14                    | 0.92      | 87.6 |
| <b>P1</b>   | 286.50               | 1.00      | 2.0  | 283.44                          | 1.00      | 4.5  | 283.44                    | 1.00      | 3.1  |
| <b>Loss</b> | 288.60               | 1.30      | 4.6  | 286.41                          | 1.30      | 2.1  | 286.41                    | 1.30      | 2.8  |
| <b>Loss</b> | 290.60               | 1.50      | 6.8  | 287.95                          | 1.50      | 3.5  | 287.97                    | 1.50      | 1.6  |
| <b>Loss</b> | 284.60               | 0.80      | 86.6 | 289.90                          | 1.50      | 3.0  | 289.92                    | 1.50      | 2.9  |

|             | 0.3ML, KE=35eV<br>Cu(111) |               |      | 0.6ML, KE=35eV Cu(111) |                  |      |
|-------------|---------------------------|---------------|------|------------------------|------------------|------|
|             | BE<br>[eV]                | FWH<br>M [eV] | %    | BE<br>[eV]             | FWH<br>M<br>[eV] | %    |
| <b>C-C</b>  | 284.1<br>1                | 0.92          | 84.1 | 284.<br>11             | 0.92             | 85.1 |
| <b>P1</b>   | 283.4<br>4                | 1.00          | 4.5  | 283.<br>44             | 1.00             | 3.9  |
| <b>Loss</b> | 286.4<br>2                | 1.30          | 5.1  | 286.<br>41             | 1.30             | 4.6  |
| <b>Loss</b> | 287.9<br>4                | 1.50          | 3.4  | 287.<br>97             | 1.50             | 3.4  |
| <b>Loss</b> | 289.8<br>9                | 1.50          | 2.9  | 289.<br>92             | 1.50             | 3.0  |

**Table S3** Analysis of C1s CL from 1 ML C<sub>60</sub> film on Cu(111), deposited at RT by SuMBE at 35 eV after different thermal treatments.

|             | TT @ 425°C |                  |      |            | TT @ 645°C |                  |      | TT @ 795°C |                  |      | Graphene STD |                  |      |
|-------------|------------|------------------|------|------------|------------|------------------|------|------------|------------------|------|--------------|------------------|------|
|             | BE<br>[eV] | FWH<br>M<br>[eV] | %    |            | BE<br>[eV] | FWH<br>M<br>[eV] | %    | BE<br>[eV] | FWH<br>M<br>[eV] | %    | BE<br>[eV]   | FWH<br>M<br>[eV] | %    |
| <b>C-C</b>  | 284.14     | 0.92             | 87.6 | <b>C-C</b> | 284.23     | 1.03             | 88.8 | 284.30     | 1.00             | 88.1 | 284.66       | 0.88             | 95.1 |
| <b>P1</b>   | 283.44     | 1.00             | 3.1  | <b>P1</b>  | 283.56     | 1.00             | 8.9  | 283.57     | 1.00             | 7.9  |              |                  |      |
| <b>Loss</b> | 286.41     | 1.30             | 2.8  | <b>P2</b>  | 285.35     | 1.22             | 2.3  | 285.35     | 1.30             | 4.0  | 285.66       | 1.00             | 2.7  |
| <b>Loss</b> | 287.97     | 1.50             | 1.6  | <b>C-O</b> |            |                  |      |            |                  |      | 287.40       | 1.30             | 2.2  |
| <b>Loss</b> | 289.92     | 1.50             | 2.9  |            |            |                  |      |            |                  |      |              |                  |      |

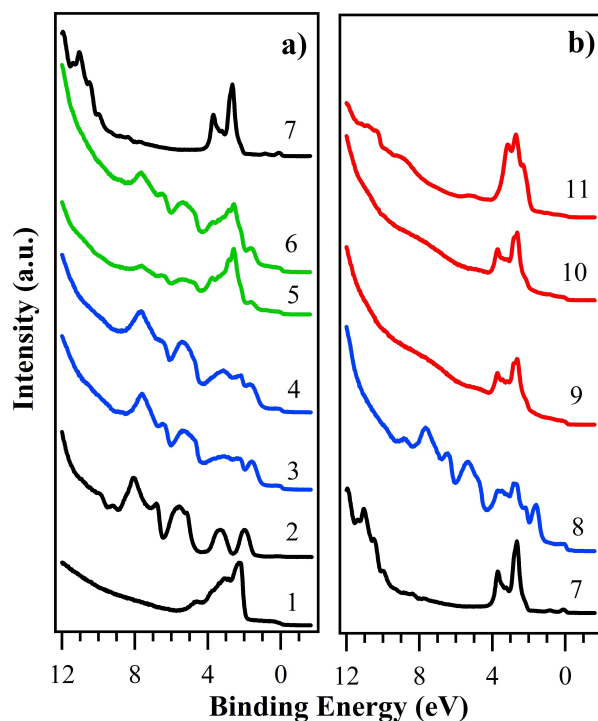

**Figure S3** a) Valence band analysis of  $C_{60}$  films deposited by SuMBE on Cu poly at 15 eV KE (2-4) and Cu(111) at 35 eV KE (5, 6) with thickness: 1) 20 nm; 3) 1 ML, after annealing at 430°C of a 20 nm film; 4) 1 ML; 5) 0.3 ML; 6) 0.6 ML. b) C1s from a  $C_{60}$  1 ML film deposited at RT and precursor 35 eV KE, after thermal annealing at 425°C (8), 645°C (9), 795°C (10). All depositions were performed keeping the substrate at RT. VB from Cu poly (1), Cu(111) (7) and graphene single layer (10) are shown for comparison.
